# Supplementary material
Source: PubMed Central journal article supplement (PMC6705091)
Supplement: ao9b00985_si_001.pdf [file ao9b00985_si_001.pdf]

# **TOF-SIMS analysis using $\text{Bi}_3^+$ as primary ions on Au nanoparticles supported by $\text{SiO}_2/\text{Si}$ : providing insight into metal-support interactions**

Il Hee Kim<sup>a,b,†</sup>, Byeong Jun Cha<sup>a,†</sup>, Chang Min Choi<sup>b</sup>, Jong Sung Jin<sup>c</sup>,  
Myoung Choul Choi<sup>b,\*</sup>, and Young Dok Kim<sup>a,\*</sup>

<sup>a</sup>Department of Chemistry, Sungkyunkwan University,  
2066, Seobu-ro, Suwon, 16419, South Korea

<sup>b</sup>Mass Spectrometry and Advanced Instrument Group,  
Korea Basic Science Institute, Ochang Center,  
162, Yeongudanji-ro, Cheongju, 28119, South Korea

<sup>c</sup>Division of High Technology Materials Research,  
Korea Basic Science Institute, Busan Center,  
30, Gwahaksandan 1-ro 60beon-gil, Busan, 46742, South Korea

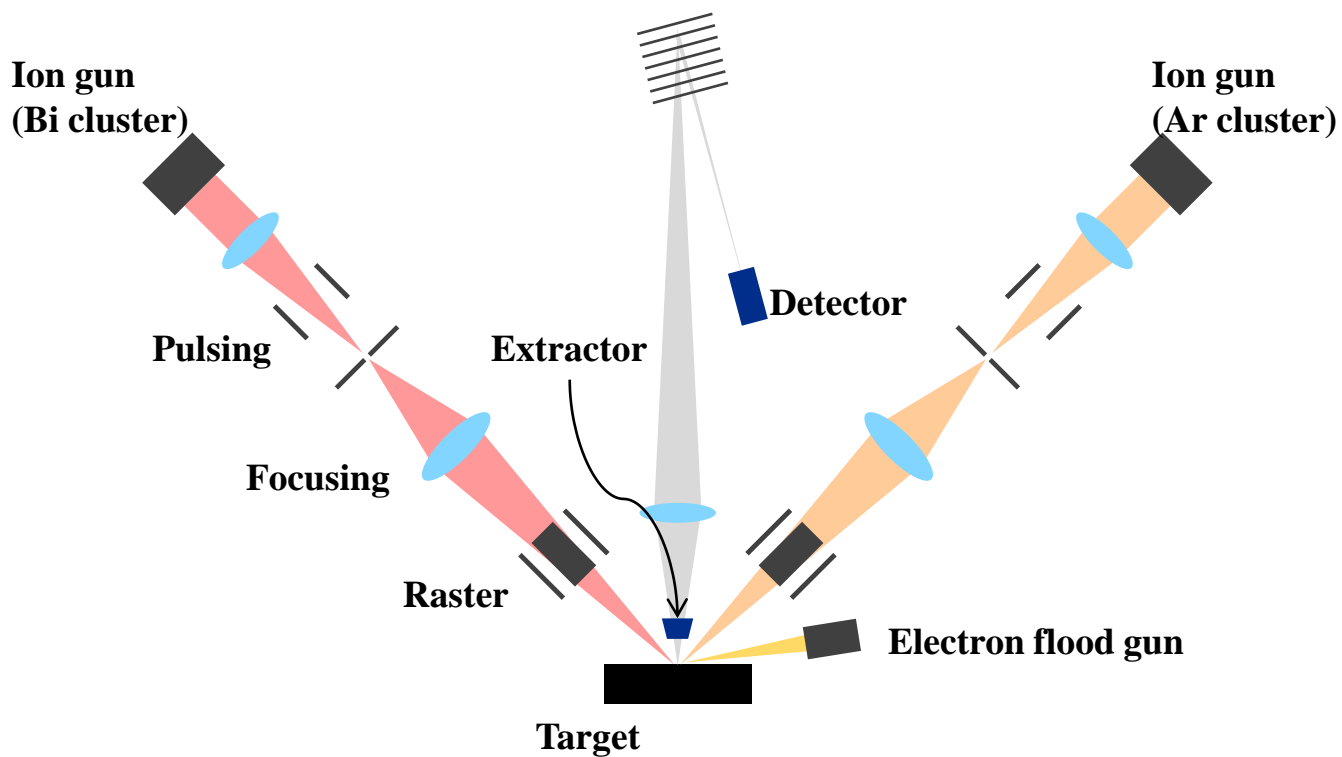

**Figure S1.** Schematic description of experimental set-up for TOF-SIMS

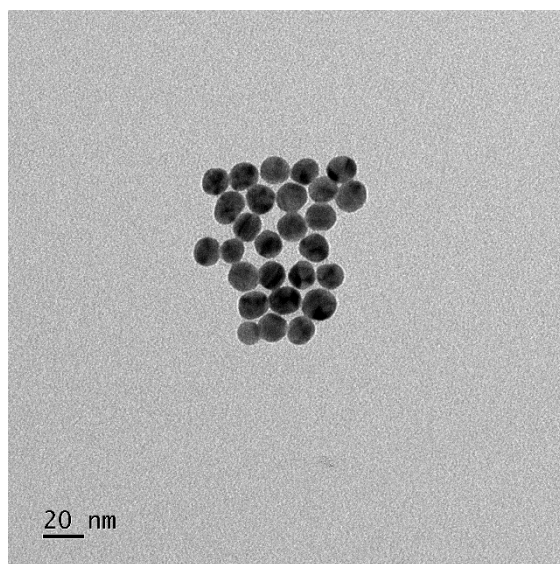

**Figure S2.** TEM image of Au/Si

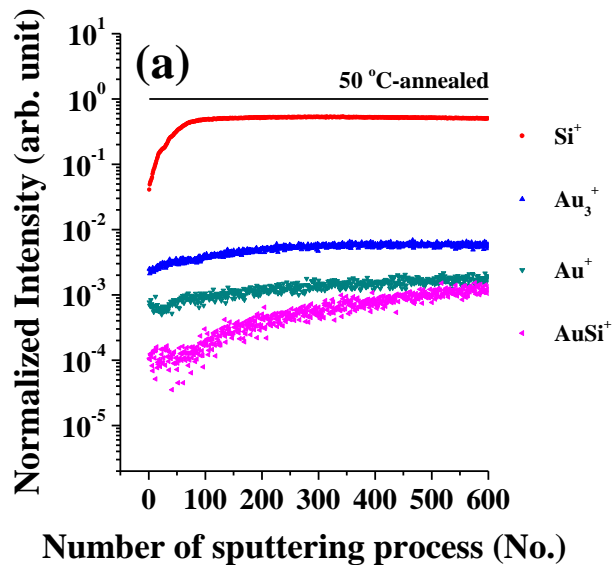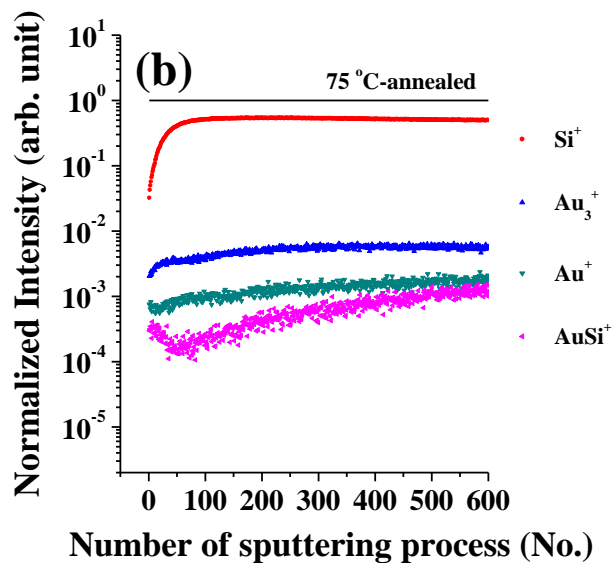

**Figure S3.** Change in the intensity of  $\text{Au}^+$ ,  $\text{Au}_2^+$ ,  $\text{Si}^+$  and  $\text{AuSi}^+$  signal as a function of number of sputtering + SIMS cycles collected from the surface of (a) 50°C and (b) 75°C annealed Au/Si samples.

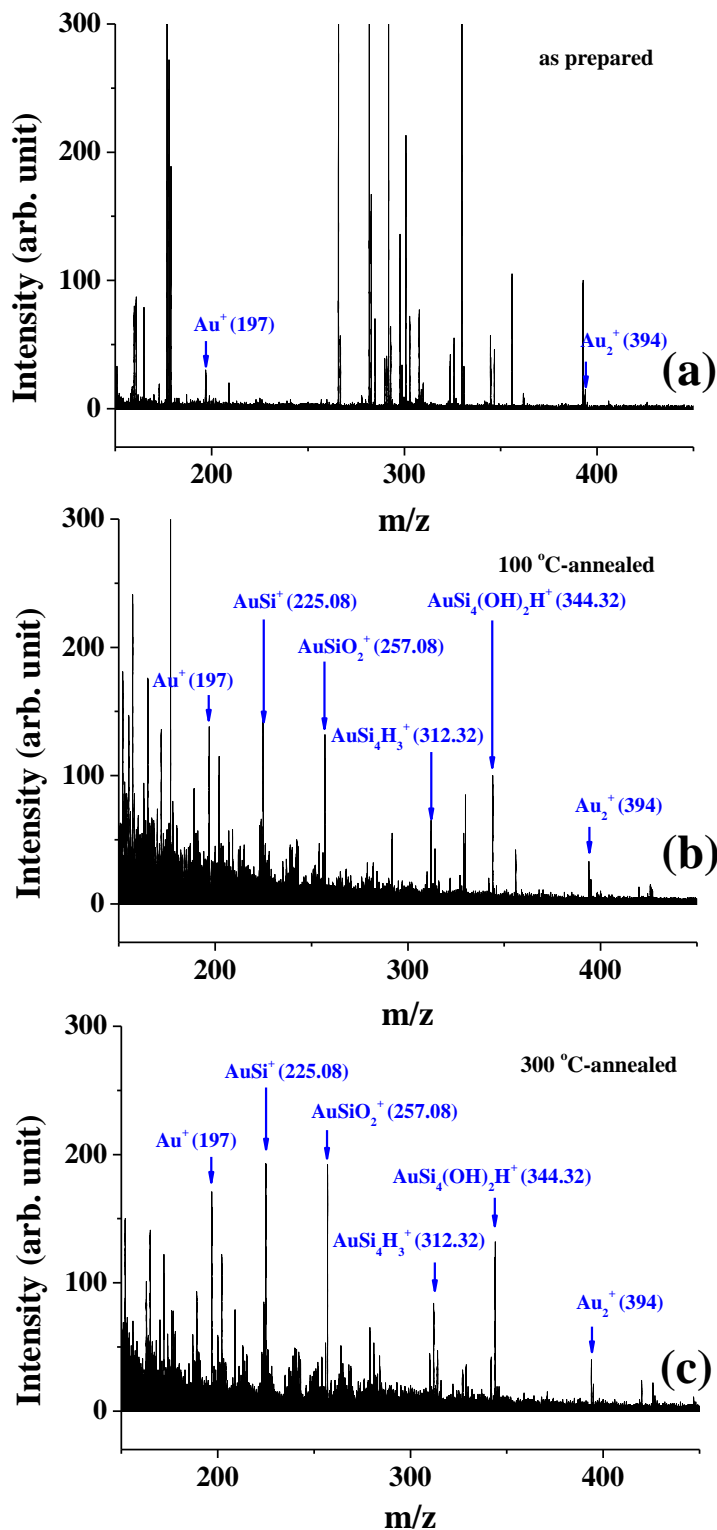

**Figure S4.** SIMS spectra of (a) as-prepared Au/Si, (b) 100°C and (c) 300°C annealed Au/Si samples using  $\text{Bi}_3^+$  as a primary ion are displayed in  $m/z$  range between 100 and 400. Please note that these spectra are identical with those in Figure 3, but more detailed peak assignments are given here.

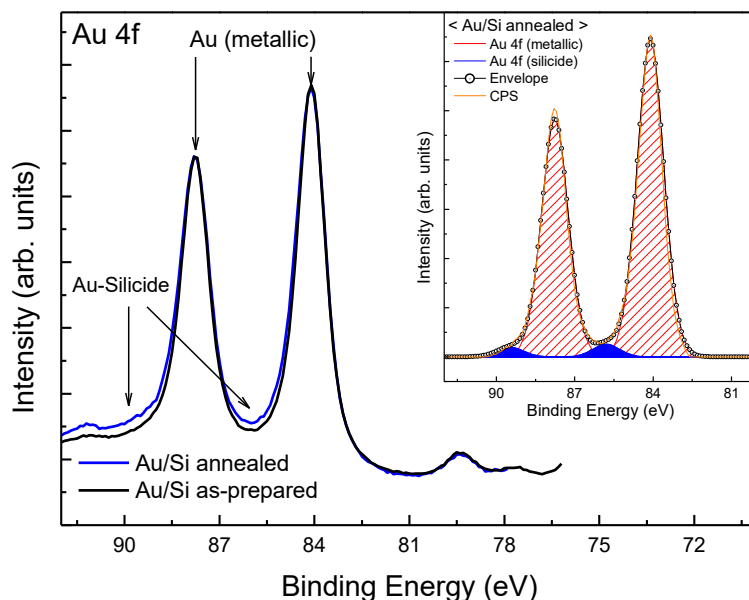

**Figure S5.** Au 4f XPS spectra of as-prepared Au/Si and annealed Au/Si samples are displayed. In inset graph, de-convoluted Au 4f spectrum of annealed Au/Si is given. For XPS analysis, a concentric hemispherical analyzer (PHOIBOS-Has 2500, SPECS) and Mg K-alpha line (1253.6 eV, natural line width of 0.7 eV) were used under UHV condition. Binding energies were calibrated with metallic Au 4f<sub>7/2</sub> (84.1 eV) and intensities were normalized by Au 4f<sub>7/2</sub>.

**Table S1.** Information for the de-convolution of Au 4f spectrum of annealed Au/Si.

|                     | Au 4f <sub>7/2</sub><br>(metallic) | Au 4f <sub>7/2</sub><br>(metallic) | Au 4f <sub>7/2</sub><br>(Au-silicide) | Au 4f <sub>5/2</sub><br>(Au-silicide) |
|---------------------|------------------------------------|------------------------------------|---------------------------------------|---------------------------------------|
| Binding Energy (eV) | 84.1                               | 87.76                              | 85.8                                  | 89.46                                 |
| FWHM                | 1.2                                | 1.2                                | 1.2                                   | 1.2                                   |
| Area                | 42000                              | 31500                              | 1700                                  | 1275                                  |
